# Supplementary material
Source: PubMed Central journal article supplement (PMC6563590)
Supplement: jamasurg-154-844-s001.pdf [file jamasurg-154-844-s001.pdf]

## Supplementary Online Content

Hicks CW, Wang P, Kernodle A, Lum YW, Black JH III, Makary MA. Assessment of use of arteriovenous graft vs arteriovenous fistula for first-time permanent hemodialysis access. Published online June 12, 2019. *JAMA Surg*. doi:10.1001/jamasurg.2019.1736

**eTable 1.** Current Procedural Terminology codes used to identify hemodialysis access procedures

**eTable 2.** *International Classification of Diseases, Tenth Revision, Clinical Modification (ICD-10-CM)* diagnosis codes for chronic kidney disease and end-stage renal disease

**eTable 3.** Region definitions by state.

This supplementary material has been provided by the authors to give readers additional information about their work.

**eTable 1. Current Procedural Terminology codes used to identify hemodialysis access procedures**

| <b>CPT code</b> | <b>Description</b>                                                                                                                                                        |
|-----------------|---------------------------------------------------------------------------------------------------------------------------------------------------------------------------|
| <b>AVG</b>      |                                                                                                                                                                           |
| 36830           | Creation of arteriovenous fistula by other than direct arteriovenous anastomosis (separate procedure); nonautogenous graft (eg, biological collagen, thermoplastic graft) |
| <b>AVF</b>      |                                                                                                                                                                           |
| 36818           | Arteriovenous anastomosis, open; by upper arm cephalic vein transposition                                                                                                 |
| 36819           | Arteriovenous anastomosis, open; by upper arm basilic vein transposition                                                                                                  |
| 36820           | Arteriovenous anastomosis, open; by forearm vein transposition                                                                                                            |
| 36821           | Arteriovenous anastomosis, open; direct, any site (eg, Cimino type) (separate procedure)                                                                                  |
| 36825           | Creation of arteriovenous fistula by other than direct arteriovenous anastomosis (separate procedure); autogenous graft                                                   |

**eTable 2. International Classification of Diseases, Tenth Revision, Clinical Modification (ICD-10-CM) diagnosis codes for chronic kidney disease and end-stage renal disease**

| ICD-10-CM code | Description                                                                                                            |
|----------------|------------------------------------------------------------------------------------------------------------------------|
| E11.22         | Type 2 diabetes mellitus with diabetic chronic kidney disease                                                          |
| N18.3          | Chronic kidney disease, stage 3 (moderate)                                                                             |
| N18.4          | Chronic kidney disease, stage 4 (severe)                                                                               |
| N18.5          | Chronic kidney disease, stage 5                                                                                        |
| N18.6          | End stage renal disease                                                                                                |
| N18.9          | Chronic kidney disease, unspecified                                                                                    |
| N19            | Unspecified kidney failure                                                                                             |
| I12.0          | Hypertensive chronic kidney disease with stage 5 chronic kidney disease or end stage renal disease                     |
| I12.9          | Hypertensive chronic kidney disease, unspecified, with chronic kidney disease stage I through stage IV, or unspecified |
| Z99.2          | End stage renal disease on renal dialysis                                                                              |

**eTable 3. Region definitions by state.**

| <b>Region</b>      | <b>Included States</b>                                                                                                                                                                               |
|--------------------|------------------------------------------------------------------------------------------------------------------------------------------------------------------------------------------------------|
| Northeast          | Connecticut, Maine, Massachusetts, New Hampshire, Rhode Island, Vermont, New Jersey, New York, Pennsylvania                                                                                          |
| Midwest            | Illinois, Indiana, Michigan, Ohio, Wisconsin, Iowa, Kansas, Minnesota, Missouri, Nebraska, North Dakota, South Dakota                                                                                |
| South              | Delaware, District of Columbia, Florida, Georgia, Maryland, North Carolina, South Carolina, Virginia, West Virginia, Alabama, Kentucky, Mississippi, Tennessee, Arkansas, Louisiana, Oklahoma, Texas |
| West               | Arizona, Colorado, Idaho, Montana, Nevada, New Mexico, Utah, Wyoming, Alaska, California, Hawaii, Oregon, Washington                                                                                 |
| Other <sup>a</sup> | Guam, Northern Mariana Islands, Puerto Rico, Virgin Islands                                                                                                                                          |

<sup>a</sup>U.S. territories that are not part of any census region.
